# Supplementary material
Source: MDPI journal article supplement (https://www.mdpi.com/1996-1073/13/17/4572)
Supplement: s1 [file s1]

# Supplementary Material

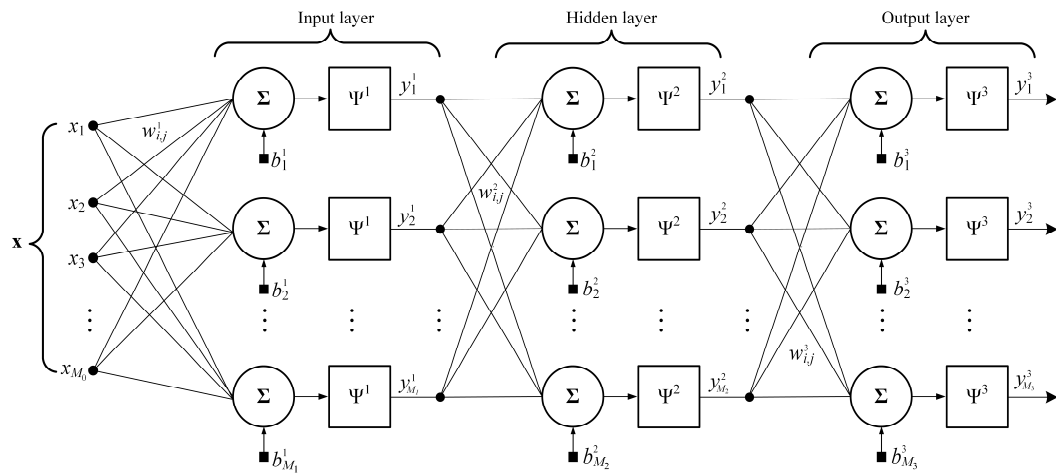

**Figure 1S.** Architecture of a feedforward MLP ANN with one input, one hidden and one output layer.

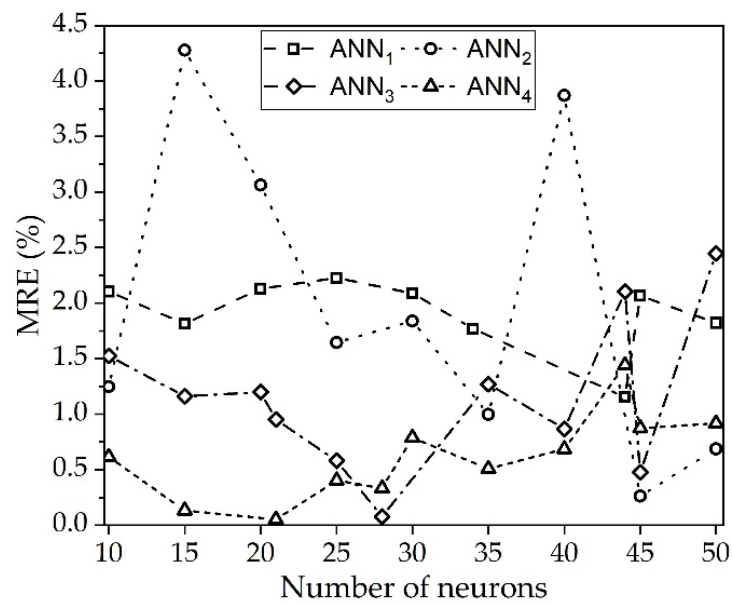

**Figure 2S.** MRE (%) as a function of the number of neurons in the hidden layer.
